# Supplementary material
Source: publisher site journal article supplement (https://www.dovepress.com/article/559860)
Supplement: Supplementary file 1 [file table%20S1.docx]

**Supplementary Table S1. Search strategy**

| **NO** | **DATABASE** | **KEYWORD** |
| --- | --- | --- |
| 1 | Pubmed | (ovarian neoplasms [MeSH Terms] OR “ovarian cancer”) AND (“robotic-assisted laparoscopy” OR “robotic laparoscopy” OR “laparoscopic interval debulking” OR “robotic surgical procedures” OR “robot-assisted interval debulking”) AND (“surgical outcomes” OR “complete cytoreduction” OR “cytoreduction” OR “length of hospital stay” OR “hospital stay duration” OR “LOS” OR “estimated blood loss” OR “EBL” OR “intraoperative blood loss” OR “operative time” OR “surgery duration” OR “surgical time” OR “procedure time” OR “complication”) |
| 2 | SCOPUS | ( (“ovarian neoplasms” OR “ovarian cancer”) AND (“robotic-assisted laparoscopy” OR “robotic laparoscopy” OR “laparoscopic interval debulking” OR “robotic surgical procedures” OR “robot-assisted interval debulking”) AND (“surgical outcomes” OR “complete cytoreduction” OR “cytoreduction” OR “length of hospital stay” OR “hospital stay duration” OR “LOS” OR “estimated blood loss” OR “EBL” OR “intraoperative blood loss” OR “operative time” OR “surgery duration” OR “surgical time” OR “procedure time” OR “complication”) ) |
| 3 | Google Scholar | (“ovarian neoplasms” OR “ovarian cancer”) AND (“robotic-assisted laparoscopy” OR “robotic laparoscopy” OR “laparoscopic interval debulking” OR “robotic surgical procedures” OR “robot-assisted interval debulking”) AND (“surgical outcomes” OR “complete cytoreduction” OR “cytoreduction” OR “length of hospital stay” OR “hospital stay duration” OR “LOS” OR “estimated blood loss” OR “EBL” OR “intraoperative blood loss” OR “operative time” OR “surgery duration” OR “surgical time” OR “procedure time” OR “complication”) |
| 4 | EBSCOhost | (“ovarian neoplasms” OR “ovarian cancer”) AND (“robotic-assisted laparoscopy” OR “robotic laparoscopy” OR “laparoscopic interval debulking” OR “robotic surgical procedures” OR “robot-assisted interval debulking”) AND (“surgical outcomes” OR “complete cytoreduction” OR “cytoreduction” OR “length of hospital stay” OR “hospital stay duration” OR “LOS” OR “estimated blood loss” OR “EBL” OR “intraoperative blood loss” OR “operative time” OR “surgery duration” OR “surgical time” OR “procedure time” OR “complication”) |
| 5 | SAGE | (“ovarian neoplasms” OR “ovarian cancer”) AND (“robotic-assisted laparoscopy” OR “robotic laparoscopy” OR “laparoscopic interval debulking” OR “robotic surgical procedures” OR “robot-assisted interval debulking”) AND (“surgical outcomes” OR “complete cytoreduction” OR “cytoreduction” OR “length of hospital stay” OR “hospital stay duration” OR “LOS” OR “estimated blood loss” OR “EBL” OR “intraoperative blood loss” OR “operative time” OR “surgery duration” OR “surgical time” OR “procedure time” OR “complication”) |
